# Supplementary material for: Reconstructing volcanic plume evolution integrating satellite and ground-based data: application to the 23 November 2013 Etna eruption
Source: Copernicus journal article supplement (doi:10.5194/acp-18-4695-2018), 2018-04-06
Supplement: Supplementary file [file acp-18-4695-2018-supplement-title-page.pdf › acp-18-4695-2018-supplement-title-page.pdf]

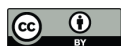

## *Supplement of*

# **Reconstructing volcanic plume evolution integrating satellite and ground-based data: application to the 23 November 2013 Etna eruption**

**Matthieu Poret et al.**

*Correspondence to:* Matthieu Poret (matthieu.poret@gmail.com)

- acp-18-4695-2018-supplement-title-page.pdf
- Supplement
  - Animation A1 - SEVIRI retrievals.mp4
  - Animation A2 - Loading animation.gif
  - Animation A3 - FALL3D animation -  $G=0.40$ .gif
  - Animation A4 - FALL3D animation -  $G=0.65$ .gif

The copyright of individual parts of the supplement might differ from the CC BY 4.0 License.
